# Supplementary material for: Hemispheric Lateralization in Older Adults Who Habitually Play Darts: A Cross-Sectional Study Using Functional Near-Infrared Spectroscopy
Source: MDPI journal article supplement (doi:10.3390/healthcare12070734), 2024-03-27
Supplement: s1 [file s1]

### Supplementary Materials

**Table S1.** Brain regions that showed task-related activation for each individual in the planning block (younger group). Only regions of interest that showed  $p < 0.05$  (FDR corrected at peak level) are shown.

| Participant | Anatomical Region | t-value | p-value (FDR-corrected) | Participant | Anatomical Region | t-value | p-value (FDR-corrected) |
|-------------|-------------------|---------|-------------------------|-------------|-------------------|---------|-------------------------|
| 1           | IPL.L             | 3.765   | 5.76E-04                | 11          | MFG.L             | 5.449   | 2.54E-07                |
|             | MFG.L             | 4.408   | 4.06E-05                |             | MFG.R             | 8.413   | 8.76E-16                |
|             | MFG.R             | 10.33   | 5.57E-23                |             | SFGdor.L          | 6.024   | 1.12E-08                |
|             | SFGdor.L          | 7.434   | 1.48E-12                |             | SFGdor.R          | 8.779   | 5.39E-17                |
|             | SFGdor.R          | 9.248   | 9.70E-19                | 12          | MFG.L             | 4.957   | 1.77E-06                |
| 2           | IPL.R             | -4.224  | 3.05E-04                |             | MFG.R             | 5.836   | 2.56E-08                |
|             | MFG.L             | 2.498   | 0.038                   |             | SFGdor.L          | 6.686   | 1.67E-10                |
|             | MFG.R             | -2.941  | 0.012                   |             | SFGdor.R          | 5.824   | 2.63E-08                |
|             | SFGdor.R          | -2.978  | 0.012                   | 13          | IPL.L             | -2.443  | 0.035                   |
| 3           | IPL.R             | 3.342   | 0.002                   |             | MFG.L             | 5.219   | 1.93E-06                |
|             | MFG.R             | 6.801   | 1.32E-10                | 14          | SFGdor.L          | 5.193   | 2.03E-06                |
|             | SFGdor.R          | 5.896   | 2.37E-08                |             | MFG.R             | 7.688   | 3.71E-13                |

|   |          |        |          |    |          |        |          |
|---|----------|--------|----------|----|----------|--------|----------|
| 4 | IPL.L    | -3.846 | 1.84E-04 | 15 | SFGdor.R | 6.225  | 2.75E-09 |
|   | IPL.R    | -4.344 | 2.73E-05 |    | IPL.L    | -3.952 | 2.21E-04 |
|   | MFG.L    | -6.759 | 7.67E-11 |    | MFG.R    | 8.127  | 8.13E-15 |
|   | MFG.R    | -2.298 | 0.028    |    | SFGdor.R | 9.337  | 7.87E-19 |
|   | SFGdor.L | -4.55  | 1.07E-05 | 16 | IPL.L    | -6.443 | 3.36E-09 |
|   | SFGdor.R | -2.273 | 0.029    |    | MFG.R    | 2.473  | 0.026    |
| 5 | MFG.L    | 8.83   | 9.44E-18 | 17 | IPL.L    | -4.459 | 9.81E-05 |
|   | MFG.R    | 6.576  | 2.80E-10 |    | SFGdor.L | -2.842 | 0.02     |
|   | SFGdor.L | 19.18  | 2.87E-77 | 18 | IPL.L    | -9.742 | 1.12E-20 |
|   | SFGdor.R | 7.335  | 1.45E-12 |    | MFG.L    | -3.147 | 0.005    |
| 6 | IPL.R    | 6.645  | 3.50E-10 |    | MFG.R    | -3.923 | 3.48E-04 |
|   | SFGdor.L | -4.996 | 2.78E-06 |    | SFGdor.L | -5.72  | 7.17E-08 |
|   | SFGdor.R | 2.399  | 0.028    |    | SFGdor.R | -4.389 | 5.23E-05 |
| 7 | IPL.L    | 2.771  | 0.008    | 19 | IPL.L    | 6.362  | 7.05E-10 |
|   | IPL.R    | 4.191  | 6.82E-05 |    | MFG.L    | 7.276  | 2.11E-12 |
|   | MFG.R    | 4.289  | 4.64E-05 |    | MFG.R    | 7.561  | 3.03E-13 |
|   | SFGdor.L | 4.583  | 1.38E-05 |    | SFGdor.L | 6.035  | 4.98E-09 |

|    |          |       |          |    |          |       |          |
|----|----------|-------|----------|----|----------|-------|----------|
|    | SFGdor.R | 4.365 | 3.38E-05 |    | SFGdor.R | 10.65 | 3.69E-24 |
| 8  | IPL.L    | 4.411 | 1.56E-05 | 20 | MFG.R    | 4.538 | 1.88E-05 |
|    | IPL.R    | 4.257 | 3.09E-05 |    | SFGdor.R | 4.636 | 1.26E-05 |
|    | MFG.L    | 5.811 | 1.70E-08 | 21 | IPL.L    | 2.346 | 0.033    |
|    | MFG.R    | 5.317 | 2.31E-07 |    | MFG.L    | 3.582 | 9.94E-04 |
|    | SFGdor.L | 9.745 | 5.83E-21 |    | MFG.R    | 12.54 | 9.28E-34 |
|    | SFGdor.R | 6.694 | 7.43E-11 |    | SFGdor.L | 4.791 | 5.92E-06 |
| 10 | IPL.L    | 3.432 | 0.002    |    | SFGdor.R | 12.01 | 3.62E-31 |
|    | MFG.L    | 3.113 | 0.004    |    |          |       |          |
|    | MFG.R    | 4.145 | 1.42E-04 |    |          |       |          |
|    | SFGdor.R | 3.909 | 3.05E-04 |    |          |       |          |

Abbreviations: IPL: Parietal Inf lobule; MFG: middle frontal gyrus; SFGdor: dorsal superior frontal gyrus; R: right; L: Left.

**Table S2.** Brain regions that showed task-related activation for each individual in the calculation block (younger group). Only regions of interest that showed  $p < 0.05$  (FDR corrected at peak level) are shown.

| Participant | Anatomical Region | t-value | p-value (FDR-corrected) | Participant | Anatomical Region | t-value | p-value (FDR-corrected) |
|-------------|-------------------|---------|-------------------------|-------------|-------------------|---------|-------------------------|
| 1           | MFG.R             | 7.509   | 2.55E-12                | 11          | IPL.L             | -3.342  | 0.002                   |

|   |          |        |          |    |          |        |          |
|---|----------|--------|----------|----|----------|--------|----------|
|   | SFGdor.L | 4.194  | 2.04E-04 |    | MFG.L    | 5.89   | 1.75E-08 |
|   | SFGdor.R | 5.533  | 7.67E-05 |    | MFG.R    | 6.951  | 2.72E-11 |
| 2 | IPL.R    | -8.217 | 1.51E-14 |    | SFGdor.L | 6.464  | 6.57E-10 |
|   | MFG.R    | -3.969 | 8.20E-04 |    | SFGdor.R | 8.092  | 8.43E-15 |
|   | SFGdor.R | -5.505 | 7.29E-07 | 13 | IPL.L    | -2.444 | 0.035    |
| 3 | IPL.L    | -5.429 | 8.59E-07 |    | MFG.L    | 5.219  | 1.93E-06 |
|   | MFG.R    | 5.85   | 8.88E-08 |    | SFGdor.L | 5.193  | 2.03E-06 |
|   | SFGdor.R | 2.523  | 0.023    | 14 | MFG.L    | 3.061  | 0.004    |
| 4 | IPL.L    | -8.516 | 7.35E-17 |    | MFG.R    | 7.079  | 9.36E-12 |
|   | IPL.R    | -9.993 | 1.64E-22 |    | SFGdor.L | 3.61   | 6.08E-04 |
|   | MFG.L    | -2.591 | 0.011    |    | SFGdor.R | 6.778  | 6.56E-11 |
|   | MFG.R    | -2.234 | 0.029    | 15 | MFG.R    | 7.157  | 1.92E-11 |
|   | SFGdor.L | -5.707 | 2.23E-08 |    | SFGdor.R | 8.688  | 2.59E-16 |
|   | SFGdor.R | -4.508 | 9.39E-06 | 16 | IPL.L    | -6.433 | 2.05E-09 |
| 5 | IPL.L    | -3.004 | 0.007    | 17 | IPL.L    | -6.99  | 4.20E-11 |
|   | MFG.L    | 6.701  | 1.05E-10 |    | MFG.L    | -7.918 | 5.44E-14 |
|   | MFG.R    | 2.79   | 0.013    |    | SFGdor.L | -8.635 | 2.21E-16 |

|   |          |        |          |    |          |        |          |
|---|----------|--------|----------|----|----------|--------|----------|
|   | SFGdor.L | 15.949 | 2.31E-54 |    | SFGdor.R | -3.074 | 0.006    |
|   | SFGdor.R | 2.956  | 0.008    |    | IPL.L    | -4.03  | 1.73E-04 |
|   | IPL.R    | 3.981  | 2.01E-04 |    | MFG.L    | -5.082 | 2.31E-06 |
|   | MFG.R    | 3.87   | 2.90E-04 | 18 | MFG.R    | -3.547 | 9.51E-04 |
| 6 | SFGdor.L | -5.067 | 2.42E-06 |    | SFGdor.L | -6.342 | 2.48E-09 |
|   | SFGdor.R | 4.977  | 3.63E-06 |    | SFGdor.R | -4.291 | 6.13E-05 |
|   | IPL.L    | 3.011  | 0.009    |    | IPL.L    | 3.566  | 6.62E-04 |
| 7 | IPL.R    | 4.247  | 1.77E-04 |    | IPL.R    | -2.674 | 0.011    |
|   | IPL.L    | 3.933  | 1.30E-04 |    | MFG.L    | 4.345  | 3.13E-05 |
|   | IPL.R    | 3.329  | 0.001    | 19 | MFG.R    | 7.278  | 1.86E-12 |
|   | MFG.L    | 5.935  | 7.59E-09 |    | SFGdor.L | 4.855  | 3.25E-06 |
| 8 | MFG.R    | 2.072  | 0.044    |    | SFGdor.R | 11.48  | 2.56E-28 |
|   | SFGdor.L | 8.248  | 2.22E-15 |    | IPL.L    | -5.517 | 6.64E-08 |
|   | SFGdor.R | 2.922  | 0.004    |    | MFG.L    | -2.113 | 0.042    |
|   | IPL.L    | -3.998 | 1.99E-04 |    | MFG.R    | 4.332  | 2.16E-05 |
|   | IPL.R    | -5.626 | 1.14E-07 |    | SFGdor.R | 3.732  | 2.57E-04 |
| 9 | MFG.L    | -3.412 | 0.001    | 21 | MFG.L    | 3.828  | 3.12E-04 |

|  |          |       |          |
|--|----------|-------|----------|
|  | MFG.R    | 14.12 | 6.09E-42 |
|  | SFGdor.L | 3.692 | 4.94E-04 |
|  | SFGdor.R | 12.36 | 3.38E-33 |

Abbreviations: IPL: Parietal Inf lobule; MFG: middle frontal gyrus; SFGdor: dorsal superior frontal gyrus; R: right; L: Left.

**Table S3.** Brain regions that showed task-related activation in the planning block for each individual (expert older group). Only regions of interest with  $p < 0.05$  (FDR corrected at peak level) are shown.

| Participant | Anatomical Region | t-value | p-value<br>(FDR-corrected) | participant | Anatomical Region | t-value | p-value<br>(FDR-corrected) |
|-------------|-------------------|---------|----------------------------|-------------|-------------------|---------|----------------------------|
| 1           | IPL.R             | 4.418   | 4.97E-05                   | 12          | MFG.L             | -5.516  | 1.33E-06                   |
|             | MFG.R             | -4.478  | 3.88E-05                   |             | MFG.R             | -4.304  | 3.30E-04                   |
| 2           | IPL.L             | 5.142   | 1.98E-06                   | 13          | MFG.L             | 6.548   | 1.97E-10                   |
|             | IPL.R             | 4.167   | 1.24E-04                   |             | MFG.R             | 3.212   | 0.002                      |
|             | MFG.L             | -4.8    | 9.13E-06                   | 14          | MFG.L             | 5.044   | 3.19E-06                   |
|             | SFGdor.L          | -3.54   | 0.001                      |             | MFG.R             | 6.031   | 2.05E-08                   |
| 3           | MFG.L             | -7.369  | 1.65E-12                   |             | SFGdor.L          | 4.537   | 2.84E-05                   |
|             | SFGdor.L          | -4.309  | 4.51E-05                   |             | SFGdor.R          | 2.859   | 0.009                      |
| 4           | IPL.R             | -5.123  | 1.03E-06                   | 15          | IPL.L             | 6.276   | 3.28E-09                   |

|    |          |        |          |    |          |        |          |
|----|----------|--------|----------|----|----------|--------|----------|
|    | MFG.L    | 4.82   | 4.32E-06 |    | IPL.R    | 7.845  | 1.55E-13 |
| 5  | IPL.R    | 2.806  | 0.01     |    | MFG.L    | 4.419  | 3.04E-05 |
|    | SFGdor.L | -3.32  | 0.002    |    | MFG.R    | 5.777  | 6.03E-08 |
| 6  | MFG.L    | -2.802 | 0.014    |    | SFGdor.R | 4.734  | 8.11E-06 |
| 7  | MFG.L    | 4.296  | 1.29E-04 | 16 | IPL.R    | -4.795 | 2.22E-05 |
|    | SFGdor.L | 3.352  | 0.003    | 17 | IPL.L    | -4.806 | 5.20E-06 |
| 8  | IPL.L    | -4.035 | 2.56E-04 |    | MFG.L    | -2.944 | 0.006    |
|    | SFGdor.R | -2.635 | 0.02     | 19 | MFG.L    | -2.989 | 0.007    |
| 9  | IPL.L    | 3.995  | 4.11E-04 |    | MFG.R    | -5.129 | 1.74E-06 |
|    | SFGdor.L | 3.754  | 9.62E-04 |    | SFGdor.L | -4.712 | 1.02E-05 |
| 10 | IPL.L    | -3.172 | 0.007    | 20 | SFGdor.R | -2.744 | 0.012    |
|    | IPL.R    | 7.868  | 2.43E-13 |    | MFG.L    | 2.756  | 0.023    |
|    | MFG.R    | 2.39   | 0.049    |    | SFGdor.L | 3.671  | 0.001    |
| 11 | MFG.R    | 7.11   | 3.42E-11 | 21 | MFG.R    | 3.168  | 0.005    |
|    | SFGdor.R | 4.948  | 1.11E-05 |    | SFGdor.R | 5.267  | 1.52E-05 |

Abbreviations: IPL: Parietal Inf lobule; MFG: middle frontal gyrus; SFGdor: dorsal superior frontal gyrus; R: right; L: Left.

**Table S4.** Brain regions that showed task-related activation for each individual in the calculation block (expert older group). Only regions of interest with  $p < 0.05$  (FDR corrected at peak level) are shown.

| Participant | Anatomical Region | t-value | p-value<br>(FDR-corrected) | Participant | Anatomical Region | t-value | p-value<br>(FDR-corrected) |
|-------------|-------------------|---------|----------------------------|-------------|-------------------|---------|----------------------------|
| 1           | IPL.R             | 4.418   | 4.97E-05                   | 13          | MFG.L             | 5.359   | 2.13E-07                   |
|             | MFG.R             | -4.478  | 3.88E-05                   |             | MFG.R             | 5.988   | 6.77E-09                   |
| 2           | IPL.L             | 5.142   | 1.98E-06                   |             | SFGdor.L          | 3.457   | 9.19E-04                   |
|             | IPL.R             | 4.167   | 1.24E-04                   |             | SFGdor.R          | 3.344   | 0.001                      |
|             | MFG.L             | -4.8    | 9.13E-06                   | 14          | MFG.R             | 3.831   | 4.78E-04                   |
|             | SFGdor.L          | -3.54   | 0.001                      | 15          | IPL.L             | 8.888   | 1.50E-17                   |
| 3           | MFG.L             | -7.369  | 1.65E-12                   |             | IPL.R             | 7.401   | 1.02E-12                   |
|             | SFGdor.L          | -4.309  | 4.51E-05                   |             | MFG.L             | 6.731   | 8.57E-11                   |
| 4           | IPL.R             | -5.123  | 1.03E-06                   |             | MFG.R             | 8.754   | 3.76E-17                   |
|             | MFG.L             | 4.82    | 4.32E-06                   |             | SFGdor.L          | 5.877   | 1.52E-08                   |
| 5           | IPL.R             | 2.806   | 0.01                       |             | SFGdor.R          | 7.612   | 2.69E-13                   |
|             | SFGdor.L          | -3.32   | 0.002                      | 16          | MFG.R             | 8.742   | 5.85E-17                   |
| 6           | MFG.L             | -2.802  | 0.014                      |             | SFGdor.L          | 4.577   | 2.61E-05                   |



|    |          |        |          |    |          |         |          |
|----|----------|--------|----------|----|----------|---------|----------|
| 7  | MFG.L    | 4.296  | 1.29E-04 | 17 | SFGdor.R | 9.739   | 1.51E-20 |
|    | SFGdor.L | 3.352  | 0.003    |    | IPL.L    | -3.792  | 3.28E-04 |
| 8  | IPL.L    | -4.035 | 2.56E-04 | 18 | MFG.R    | 4.375   | 3.15E-05 |
|    | SFGdor.R | -2.635 | 0.02     |    | IPL.L    | -2.839  | 0.012    |
| 9  | IPL.L    | 3.995  | 4.11E-04 | 19 | MFG.L    | 4.933   | 6.41E-06 |
|    | SFGdor.L | 3.754  | 9.62E-04 |    | SFGdor.L | 3.433   | 0.002    |
| 10 | IPL.L    | -3.172 | 0.007    | 20 | SFGdor.R | 3.007   | 0.013    |
|    | IPL.R    | 7.868  | 2.43E-13 |    | MFG.L    | -11.83  | 5.34E-31 |
|    | MFG.R    | 2.39   | 0.049    |    | MFG.R    | -14.5   | 1.92E-45 |
| 11 | MFG.R    | 7.11   | 3.42E-11 | 21 | SFGdor.L | -68.23  | 0        |
|    | SFGdor.R | 4.948  | 1.11E-05 |    | SFGdor.R | -93.95  | 0        |
| 12 | MFG.L    | -5.55  | 5.50E-07 | 21 | IPL.R    | 3.885   | 2.64E-04 |
|    | MFG.R    | -4.926 | 1.23E-05 |    | MFG.L    | -4.797  | 6.94E-06 |
|    |          |        |          |    | MFG.R    | 4.554   | 2.01E-05 |
|    |          |        |          |    | SFGdor.L | -21.789 | 4.15E-98 |
|    |          |        |          |    | SFGdor.R | 7.121   | 1.20E-11 |

Abbreviations: IPL: Parietal Inf lobule; MFG: middle frontal gyrus; SFGdor: dorsal superior frontal gyrus; R: right; L: Left.

**Table S5.** Brain regions that showed task-related activation for each individual in the planning block (non-expert older group). Only regions of interest with  $p < 0.05$  are shown.

| Participant | Anatomical Region | t-value | p-value<br>(FDR-corrected) | Participant | Anatomical Region | t-value | p-value<br>(FDR-corrected) |
|-------------|-------------------|---------|----------------------------|-------------|-------------------|---------|----------------------------|
| 1           | IPL.L             | 4.003   | 3.30E-04                   | 13          | IPL.L             | -6.647  | 1.57E-10                   |
|             | MFG.R             | 2.857   | 0.013                      |             | IPL.R             | -8.842  | 2.49E-17                   |
| 2           | IPL.L             | -4.04   | 9.84E-04                   |             | MFG.L             | 6.663   | 1.48E-10                   |
| 3           | MFG.L             | -4.888  | 1.43E-05                   |             | MFG.R             | 3.744   | 3.67E-04                   |
|             | MFG.R             | -4.201  | 1.22E-04                   |             | SFGdor.R          | 5.344   | 3.00E-07                   |
|             | SFGdor.L          | -4.201  | 1.22E-04                   | 14          | IPL.L             | 2.801   | 0.009                      |
|             | SFGdor.R          | -4.027  | 2.30E-04                   |             | IPL.R             | 2.918   | 0.006                      |
| 4           | MFG.L             | -5.972  | 2.00E-08                   |             | MFG.L             | -1.914  | 0.078                      |
|             | MFG.R             | -2.455  | 0.028                      | 15          | SFGdor.L          | -2.504  | 0.019                      |
|             | SFGdor.L          | -5.021  | 2.74E-06                   |             | IPL.L             | 4.378   | 4.65E-05                   |
|             | SFGdor.R          | -3.152  | 0.004                      |             | MFG.R             | -3.081  | 0.005                      |
| 5           | MFG.L             | 4.23    | 2.98E-04                   | 16          | IPL.L             | -3.582  | 0.004                      |
|             | MFG.R             | 3.643   | 0.002                      |             | MFG.L             | -3.388  | 0.006                      |

|    |          |        |          |    |          |        |          |
|----|----------|--------|----------|----|----------|--------|----------|
|    | SFGdor.R | 5.05   | 1.69E-05 |    | SFGdor.R | -2.628 | 0.031    |
| 7  | MFG.R    | -3.466 | 0.002    | 17 | IPL.L    | -3.349 | 0.002    |
|    | SFGdor.L | -4.202 | 2.30E-04 |    | MFG.L    | -2.394 | 0.027    |
| 8  | MFG.L    | 4.709  | 3.04E-05 |    | SFGdor.L | -9.055 | 2.14E-18 |
|    | MFG.R    | 2.838  | 0.014    |    | SFGdor.R | -7.301 | 1.48E-12 |
|    | SFGdor.R | 3.386  | 0.003    | 18 | IPL.L    | 14.66  | 4.98E-46 |
| 9  | IPL.L    | 6.602  | 2.53E-09 |    | MFG.L    | 5.508  | 1.02E-07 |
|    | SFGdor.L | -3.184 | 0.008    |    | SFGdor.L | 4.667  | 7.56E-06 |
| 10 | IPL.L    | 2.37   | 0.04     | 19 | SFGdor.R | 5.935  | 8.93E-09 |
|    | MFG.L    | 7.529  | 8.86E-13 |    | IPL.L    | 8.061  | 2.25E-14 |
|    | MFG.R    | 5.415  | 3.04E-07 |    | SFGdor.L | 3.538  | 8.87E-04 |
|    | SFGdor.L | 7.37   | 2.32E-12 |    | SFGdor.R | 3.536  | 8.87E-04 |
|    | SFGdor.R | 6.141  | 5.18E-09 | 20 | IPL.L    | -2.806 | 0.018    |
| 11 | MFG.L    | -4.217 | 1.30E-04 |    | IPL.R    | -3.373 | 0.004    |
|    | SFGdor.L | -3.748 | 6.50E-04 |    | MFG.L    | -8.005 | 7.56E-14 |
|    | SFGdor.R | -2.585 | 0.023    |    | SFGdor.L | -2.431 | 0.046    |
|    |          |        |          | 21 | MFG.L    | -2.649 | 0.024    |

Abbreviations: IPL: Parietal Inf lobule; MFG: middle frontal gyrus; SFGdor: dorsal superior frontal gyrus; R: right; L: Left.

**Table S6.** Brain regions that showed task-related activation for each individual in the calculation block (non-expert older group). Only regions of interest with  $p < 0.05$  are shown.

| Participant | Anatomical Region | t-value | p-value<br>(FDR-corrected) | Participant | Anatomical Region | t-value | p-value<br>(FDR-corrected) |
|-------------|-------------------|---------|----------------------------|-------------|-------------------|---------|----------------------------|
| 1           | IPL.L             | 3.241   | 0.003                      | 13          | IPL.L             | -8.63   | 1.57E-16                   |
|             | SFGdor.L          | -2.994  | 0.006                      |             | IPL.R             | -8.138  | 4.42E-15                   |
| 2           | IPL.L             | -7.816  | 7.98E-13                   |             | MFG.L             | 5.221   | 5.11E-07                   |
|             | MFG.L             | -3.72   | 0.002                      |             | MFG.R             | 3.503   | 9.32E-04                   |
| 3           | IPL.L             | -2.901  | 0.008                      |             | SFGdor.R          | 5.609   | 6.61E-08                   |
|             | IPL.R             | -2.726  | 0.013                      | 15          | IPL.R             | -2.658  | 0.025                      |
|             | MFG.L             | -5.086  | 1.88E-06                   |             | MFG.L             | -4.417  | 8.75E-05                   |
|             | SFGdor.L          | -2.479  | 0.024                      | 16          | IPL.L             | -4.386  | 4.12E-05                   |
|             | SFGdor.R          | 8.724   | 4.59E-17                   |             | IPL.R             | -3.726  | 5.33E-04                   |
| 4           | MFG.L             | -3.32   | 0.01                       |             | MFG.L             | -6.352  | 2.58E-09                   |
| 5           | IPL.R             | 2.419   | 0.032                      |             | MFG.R             | -4.675  | 1.22E-05                   |
|             | MFG.L             | 7.139   | 3.06E-11                   |             | SFGdor.L          | -2.931  | 0.007                      |

|    |          |        |          |    |          |        |          |
|----|----------|--------|----------|----|----------|--------|----------|
|    | MFG.R    | 6.862  | 1.73E-10 |    | SFGdor.R | -6.661 | 5.64E-10 |
|    | SFGdor.L | 3.649  | 9.31E-04 |    | IPL.L    | -5.71  | 7.40E-08 |
|    | SFGdor.R | 8.793  | 1.29E-16 | 17 | SFGdor.L | -4.989 | 2.74E-06 |
| 7  | SFGdor.L | -2.798 | 0.011    |    | SFGdor.R | -2.72  | 0.014    |
|    | MFG.L    | 10.47  | 7.82E-24 |    | IPL.L    | 8.34   | 3.71E-16 |
| 8  | MFG.R    | 5.262  | 7.12E-07 | 18 | MFG.R    | -2.519 | 0.017    |
|    | SFGdor.R | 5.782  | 5.24E-08 |    | SFGdor.L | 7.127  | 3.42E-12 |
|    | IPL.L    | 10.99  | 1.15E-25 |    | SFGdor.R | 5.032  | 9.95E-07 |
| 9  | SFGdor.L | -3.241 | 0.003    | 19 | IPL.L    | 7.062  | 2.39E-11 |
|    | MFG.L    | 4.3    | 6.68E-05 |    | MFG.R    | -3.826 | 3.31E-04 |
| 10 | MFG.R    | 2.867  | 0.011    |    | IPL.L    | 3.576  | 0.001    |
|    | SFGdor.L | 5.681  | 9.16E-08 |    | IPL.R    | 4.542  | 2.56E-05 |
|    | MFG.L    | -4.033 | 2.33E-04 | 20 | MFG.L    | 9.534  | 1.23E-19 |
| 11 | SFGdor.L | -2.915 | 0.009    |    | MFG.R    | 3.608  | 0.001    |
|    | SFGdor.R | -2.952 | 0.008    |    | SFGdor.L | 4.643  | 1.73E-05 |
|    | MFG.R    | -2.837 | 0.013    |    | SFGdor.R | 5.79   | 9.68E-08 |
| 12 | SFGdor.R | -2.926 | 0.01     | 21 | MFG.L    | -3.354 | 0.003    |

|  |          |        |       |
|--|----------|--------|-------|
|  | MFG.R    | -2.275 | 0.044 |
|  | SFGdor.R | -2.226 | 0.049 |

Abbreviations: IPL: Parietal Inf lobule; MFG: middle frontal gyrus; SFGdor: dorsal superior frontal gyrus; R: right; L: Left.
